# Supplementary material for: Kruppel-like factor 2 contributes to blood-spinal cord barrier integrity and functional recovery from spinal cord injury by augmenting autophagic flux
Source: Theranostics. 2023 Jan 1;13(2):849–66. doi: 10.7150/thno.74324 (PMC9830435; doi:10.7150/thno.74324)
Supplement: Supplementary file 1 — Supplementary figures and tables. [file thnov13p0849s1.pdf]

## Supplemental Data

### **Kruppel-like factor 2 contributes to blood-spinal cord barrier integrity and functional recovery from spinal cord injury by augmenting autophagic flux**

Zili He <sup>1,2#</sup>, Jiqing Du <sup>2#</sup>, Yu Zhang <sup>2</sup>, Yitie Xu <sup>2</sup>, Qian Huang <sup>2</sup>, Qingwei Zhou <sup>2</sup>, Min Wu<sup>2</sup>, Yao Li <sup>1</sup>, Xie Zhang <sup>3</sup>, Hongyu Zhang <sup>2</sup>, Yuepiao Cai <sup>1,2</sup>, Keyong Ye <sup>2</sup>, Xiangyang Wang <sup>1</sup>, Yingze Zhang <sup>1,4</sup>, Qi Han <sup>5</sup>, Jian Xiao <sup>1,2</sup>

1 Oujiang Laboratory (Zhejiang Lab for Regenerative Medicine, Vision and Brain Health), Department of Orthopaedics Surgery, The Second Affiliated Hospital and Yuying Children's Hospital of Wenzhou Medical University, Wenzhou, 325035, China.

2 Department of orthopaedics, Affiliated Pingyang Hospital and School of Pharmaceutical Science, Wenzhou Medical University, Wenzhou, 325000, China.

3 Department of Pharmacy, Ningbo Medical Treatment Center Li Huili Hospital, Ningbo, 315040, China

4. Department of Orthopaedic Surgery, The Third Hospital of Hebei Medical University, Shijiazhuang, 050051 China

5 Department of Anatomy and Physiology, Shanghai Jiao Tong University School of Medicine, Shanghai, 200025, China.

# These authors contributed equally to this work.

Correspondence should be addressed to Jian Xiao: xfxj2000@126.com, Qi Han: qihan8@shsmu.edu.cn, and Yingze Zhang: yzling\_liu@163.com

## Supplemental Figure legends

### Figure S1 Disruption of autophagy exacerbates endothelial apoptosis level.

(A) Cell viability in bEnd.3 cells exposed to OGD for 0, 3, 6, 9 and 12 h. n = 4. (B) Effect of OGD (9 h) on protein expression of LC3 and p62 from bEnd.3 cells pretreated in the absence or presence of 3-MA. n = 4 sample. (C) Effect of OGD (9 h) on protein expression of apoptosis markers (Bcl-2, Bax and Cleaved caspase 3) from bEnd.3 cells pretreated in the absence or presence of 3-MA. n = 3 sample. (D-G) Representative immunofluorescence images and quantification of LC3 (E), p62 (F), and Caspase 3 (C) in bEnd.3 cells. n = 3 sample. Shown are mean values  $\pm$  SEM; ns stands for not significant, \*  $P < 0.05$ , \*\*  $P < 0.01$ .

### Figure S2 Disruption of autophagy exacerbates ZO-1 degradation after SCI.

(A) Western blotting and quantification of autophagy markers (LC3 and p62) in spinal cord tissue prepared from SCI (3dpi) and SCI + 3-MA group. n = 6 mice in each group. (B-C) Representative immunofluorescence images and quantification of LC3 (B) and P62 (C) in endothelial cells (marked by CD31) in indicated groups at day 3 after injury.

n = 5 mice in each group. Shown are mean values  $\pm$  SEM; ns stands for not significant,  
\* P < 0.05, \*\* P < 0.01.

**Figure S3 The expression of KLF2 in bEnd.3 cells following OGD.**

(A) Western blotting and quantification of KLF2 in bEnd.3 cells after OGD treatment for different periods. n = 4 sample. (B) Representative immunofluorescence images and quantification of KLF2 in bEnd.3 cells. n = 3. Shown are mean values  $\pm$  SEM; ns stands for not significant, \* P < 0.05, \*\* P < 0.01.

**Figure S4 The overexpression and knockdown efficiency of cell transfection.**

bEnd.3 cells were respectively transfected with lentivirus-Klf2 or lentivirus-Klf2 shRNA to overexpress or knockdown KLF2 expression. (A-B) Western blotting and quantification of KLF2 in bEnd.3 respectively transfected with lentivirus-Klf2 (A) or lentivirus-Klf2 shRNA (B). (C-D) Western blotting and quantification of p62 expression in bEnd.3 respectively transfected with lentivirus-Klf2 (C) or lentivirus-Klf2 shRNA (D). Shown are mean values  $\pm$  SEM; ns stands for not significant, \* P < 0.05, \*\* P < 0.01.

**Figure S5 OGD-induced cell apoptosis is alleviated by KLF2 overexpression in bEnd.3 cells.**

(A) Western blotting and quantification of KLF2 in bEnd.3 cells respectively transfected with LV-Con or LV-Klf2, and pretreated with OGD treatment. n = 3 sample.

(B) Effect of OGD (9 h) on protein expression of apoptosis markers (Bcl-2, Bax and Cleaved caspase 3) from bEnd.3 cells respectively transfected with LV-Con or LV-Klf2. n = 4 sample. (C) Effect of OGD (9 h) on protein expression of TJs markers (ZO-1, OCC and claudin-5) from bEnd.3 cells respectively transfected with LV-Con or LV-Klf2, and pretreated in the absence or presence of CQ. n = 4 sample. (D) Representative immunofluorescence images and quantification of Caspase 3 in bEnd.3 cells. n = 3 sample. Shown are mean values  $\pm$  SEM; ns stands for not significant, \*  $P < 0.05$ , \*\*  $P < 0.01$ .

**Figure S6 Schematic of experimental timeline and Lentivirus injection.**

(A) Experimental protocol. We transfected mice with lentiviral vectors (LV-Klf2 or shRNA-Klf2) via intrathecal injection 5 days prior to SCI to overexpress or knockdown KLF2. (B) The expressions of LC3II and p62 in mice respectively transfected with LV-Con or LV-Klf2. n = 5 mice in each group. (C-D) The Western blot analysis showed that the expressions of KLF2 were overexpressed (C) or knock downed (D) in the spinal cord at day 3 after injury. n = 3 mice in each group. Shown are mean values  $\pm$  SEM; ns stands for not significant, \*  $P < 0.05$ , \*\*  $P < 0.01$ .

**Figure S7 TFEB regulated KLF2 mediated ALP in in bEnd.3 cells exposed to OGD.**

bEnd.3 cells were treated with Ad-shTFEB for 24 h and then with LV-KLF2, and then exposed to OGD for 9 h; (A) Western blot and quantification of TFEB in nuclear

subfractions of OGD-treated bEnd.3 cells. n = 4 sample. (B) Western blot and quantification of autophagy lysosome pathway markers (LC3, p62 and LAMP2) in bEnd.3 cells respectively transfected with Ad-shTFEB and LV-Klf2 after OGD treatment (9 h). n = 4 samples. (C-D) Expression of mRNA encoding TFEB (C) and protein expression of TFEB (D) in bEnd.3 cells transfected with LV-Klf2. n = 4 samples. (E) Relative mRNA level of TFEB in bEnd.3 cells transfected with shRNA-Klf2. n = 4 samples. (F) Representative immunofluorescence images and quantification of TFEB in bEnd.3 cells transfected with LV-Klf2. n = 3 sample. Shown are mean values  $\pm$  SEM; ns stands for not significant, \* P < 0.05, \*\* P < 0.01.

**Figure S8 KLF2 ameliorates BSCB disruption and motor function impairment in SCI.**

(A) Western blot and quantification of TJs markers (ZO-1, OCC and claudin-5) in spinal cord tissue from Sham, SCI, SCI+LV-Con, SCI+LV-Klf2, and SCI+LV-Klf2+CQ, group at day 3 after injury. n = 5 mice in each group. (B-C) Representative MEPs and amplitude analysis of mice at day 28 after SCI. n = 5 mice in each group. (D) BMS score analysis in each group at the indicated time points. n = 7 mice in each group. (E) Representative foot printing analysis of mice at day 28 after injury. (F) Quantification of stride lengths of hind footprints of mice. n = 5 mice in each group. Shown are mean values  $\pm$  SEM; ns stands for not significant, \* P < 0.05, \*\* P < 0.01.

**Figure S9 Proposed model of how KLF2 contributes to BSCB integrity in SCI.**

111 SCI induced the ALP dysfunction in endothelial cells disturbs redistribution of  
112 membranous TJ proteins and clearance of delocalized TJ proteins which impairs the  
113 integrity and permeability of BSCB. Meanwhile, endothelial KLF2 was suppressed  
114 after SCI, upregulated of which enhances autophagy levels and lysosomal function via  
115 regulating TFEB expression to suppress redistribution of membranous TJ proteins and  
116 to further reduce cytotoxicity, attenuating BSCB disruption.

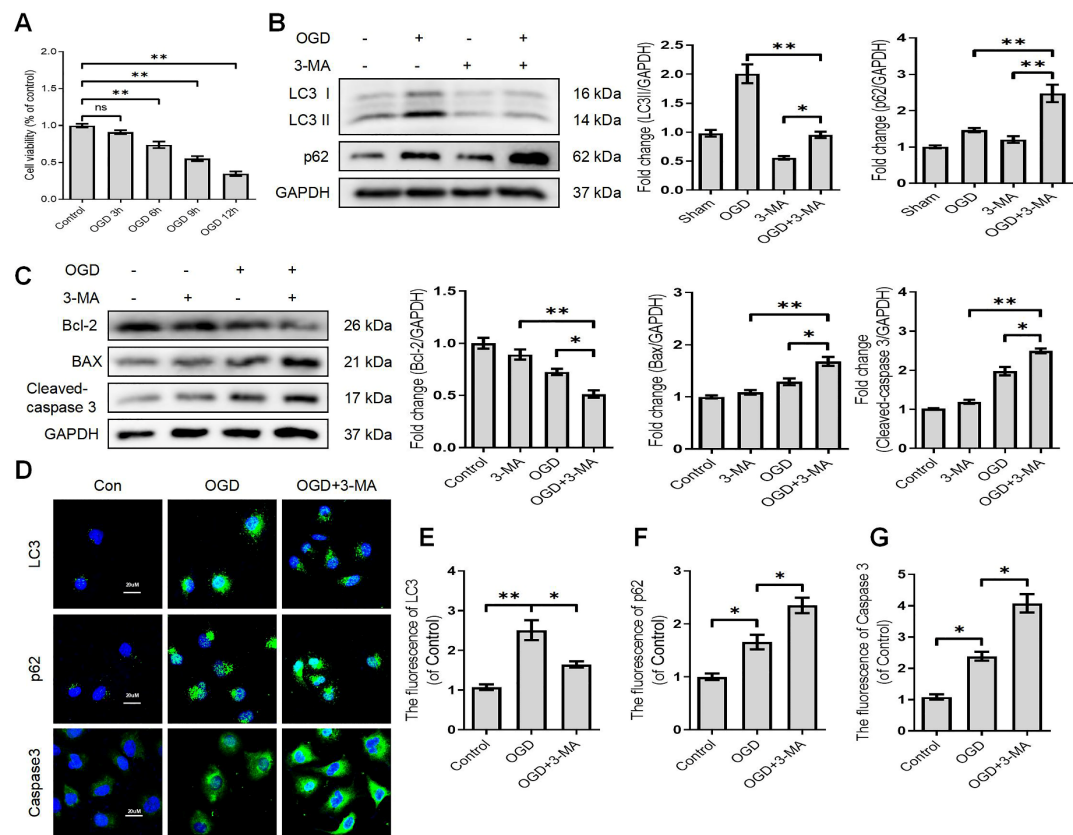

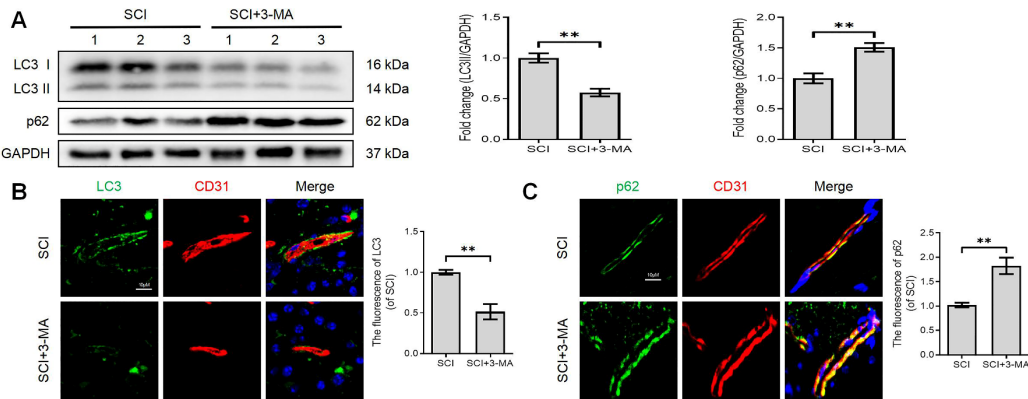

121 **FigureS3**

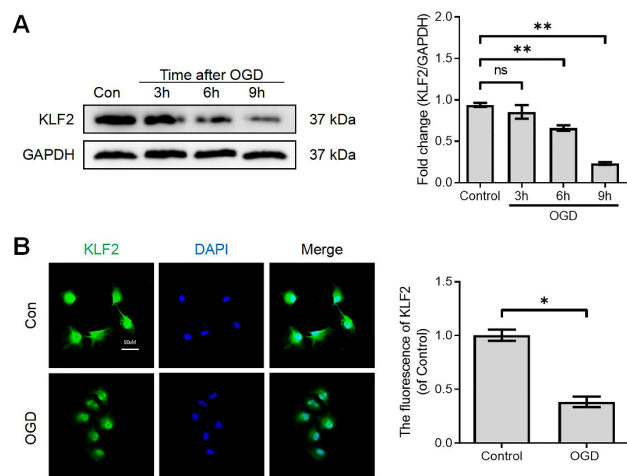

122

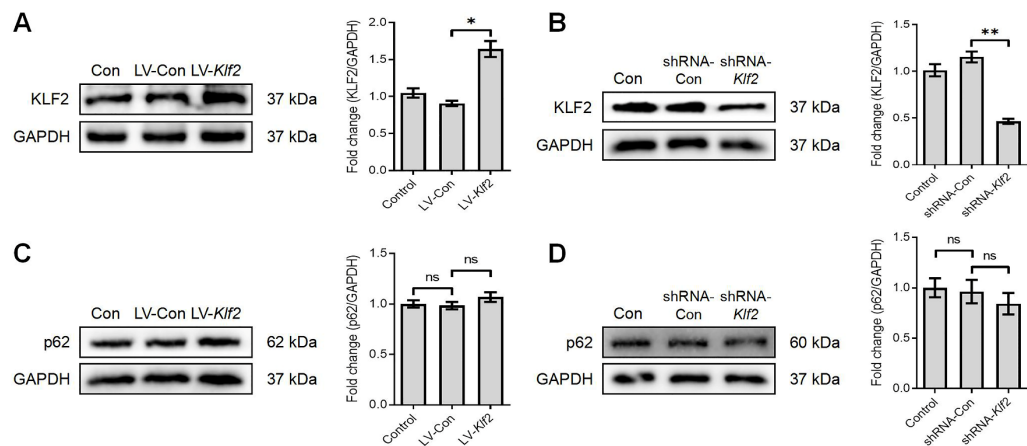

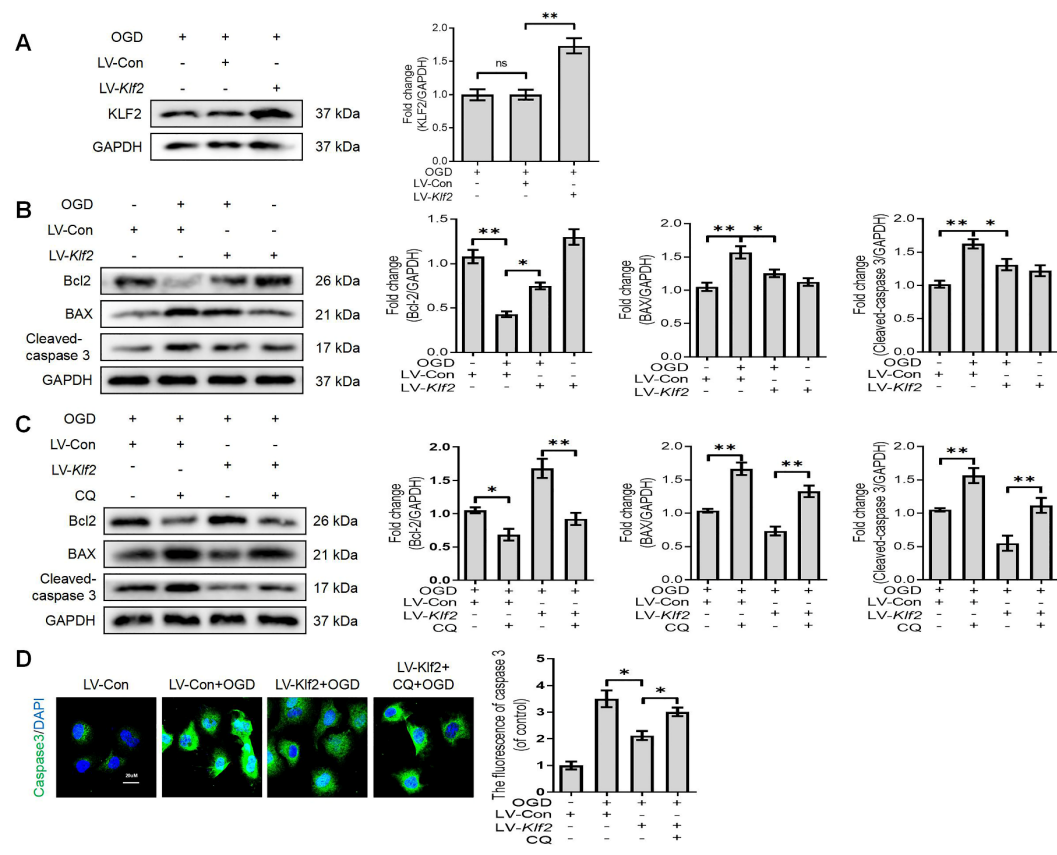

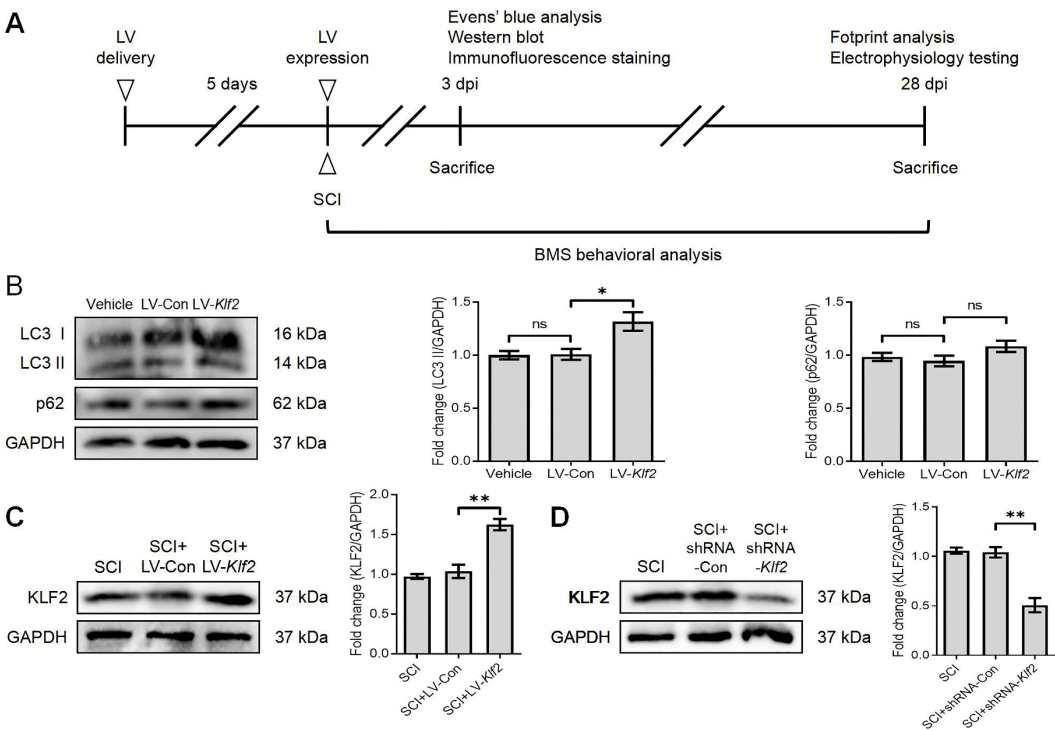

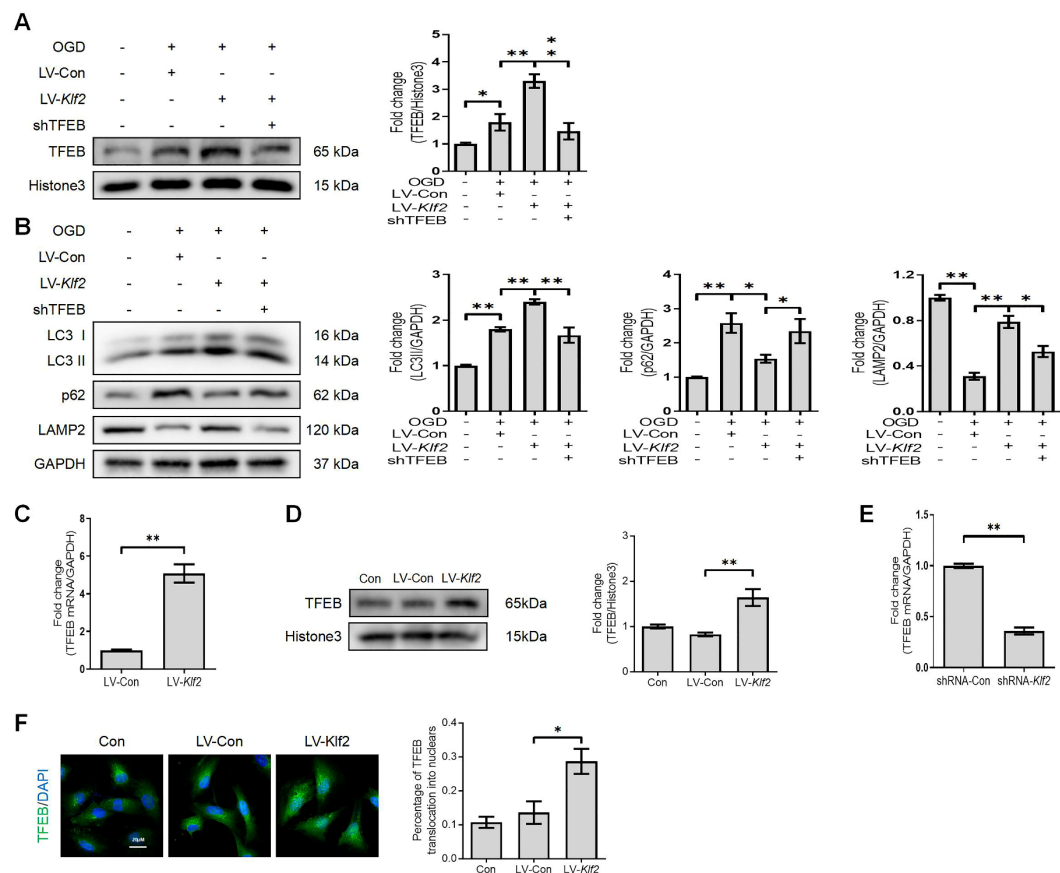

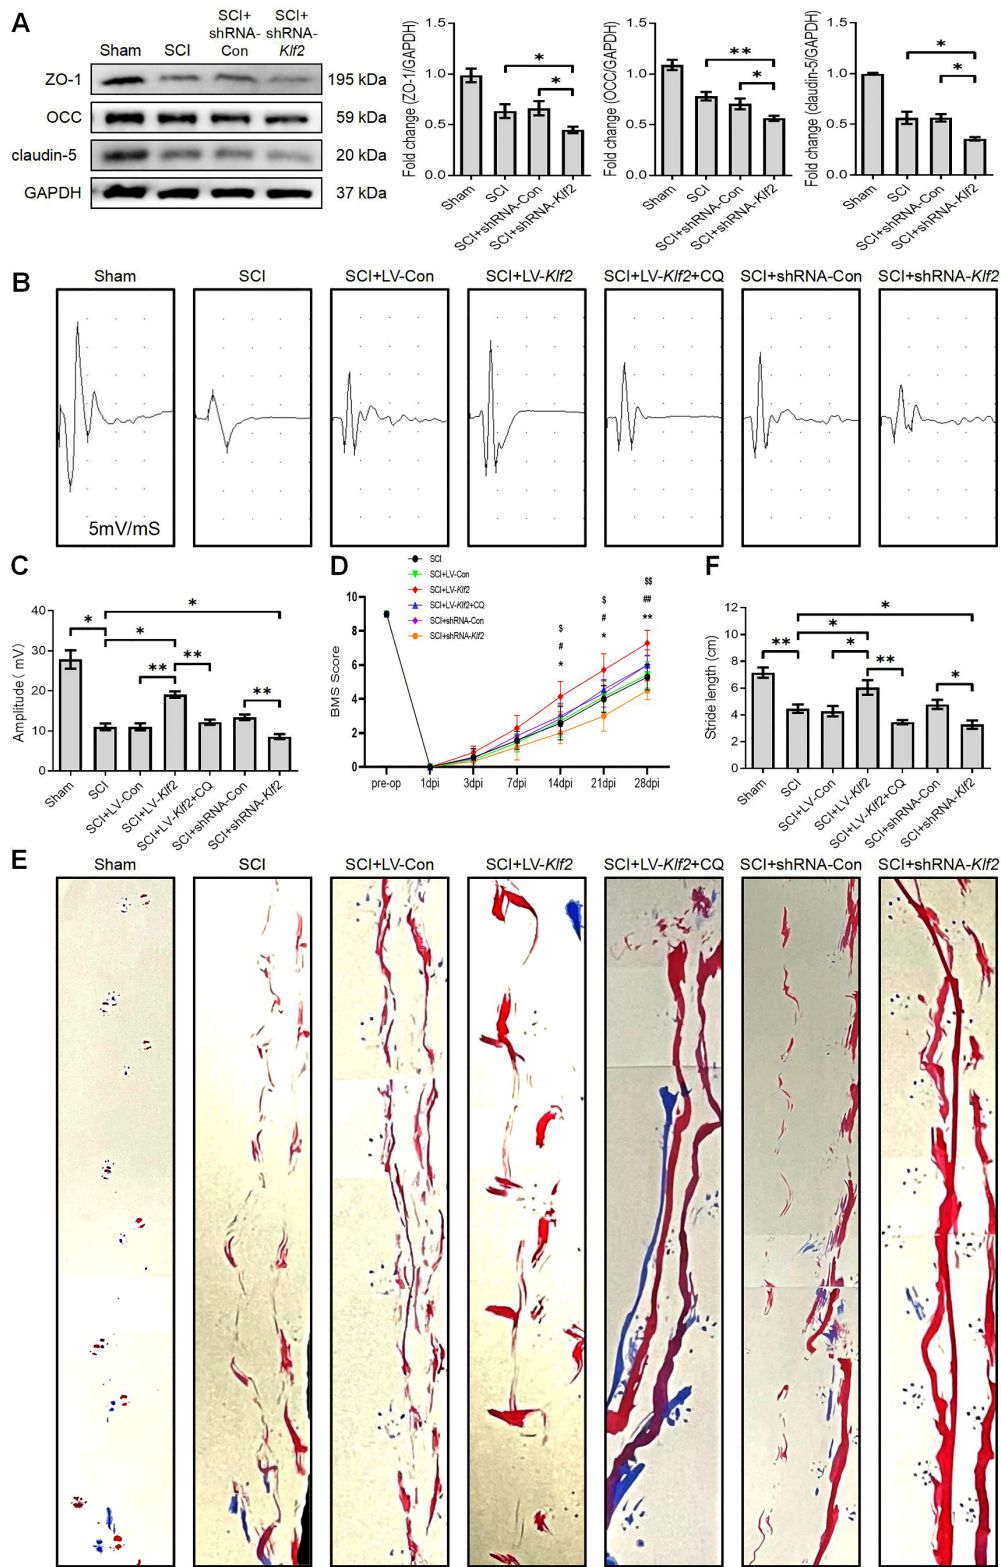

135  
136

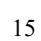

# Table S1

Table S1. The detail information of primary antibodies.

| Antibodies | Cat. No.   | Company                              | Concentration<br>for WB | Concentration<br>for IF |
|------------|------------|--------------------------------------|-------------------------|-------------------------|
| KLF2       | DF13602    | Affinity (Cincinnati, OH, USA)       | 1:1000                  | 1:100                   |
| CD31       | sc-376764  | Santa Cruz Biotechnology (CA, USA)   | /                       | 1:50                    |
| claudin 5  | 343214     | Zen bioscience (Chengdu, China)      | 1:1000                  | /                       |
| OCC        | 13409-1-AP | Proteintech Group (Chicago, IL, USA) | 1:1000                  | 1:200                   |
| ZO-1       | AF5145     | Affinity (Cincinnati, OH, USA)       | 1:1000                  | 1:200                   |
| LC3        | 14600-1-AP | Proteintech Group (Chicago, IL, USA) | 1:1000                  | 1:200                   |
| P62/SQSTM1 | 18420-1-AP | Proteintech Group (Chicago, IL, USA) | 1:1000                  | /                       |
| Beclin 1   | 11306-1-AP | Proteintech Group (Chicago, IL, USA) | 1:1000                  | /                       |
| CTSD       | 380946     | zen-bioscience (Chengdu, China)      | 1:1000                  | 1:200                   |
| LAMP1      | sc-20011   | Santa Cruz Biotechnology (CA, USA)   | /                       | 1:100                   |
| LAMP2      | 27823-1-AP | Proteintech Group (Chicago, IL, USA) | 1:1000                  | 1:100                   |
| Caspase 3  | 19677-1-AP | Proteintech Group (Chicago, IL, USA) | 1:1000                  | 1:200                   |
| Bcl2       | 26593-1-AP | Proteintech Group (Chicago, IL, USA) | 1:1000                  | /                       |
| BAX        | 50599-2-Ig | Proteintech Group (Chicago, IL, USA) | 1:1000                  | /                       |
| TFEB       | PA5-96632  | Thermo Scientific (Madison, WI, USA) | 1:1000                  | 1:200                   |
| ATP1A1     | GB11400    | Servicebio (Wuhan, China)            | 1:500                   | /                       |
| Histone 3  | 384572     | zen-bioscience (Chengdu, China)      | 1:1000                  | /                       |
| GAPDH      | 380626     | zen-bioscience (Chengdu, China)      | 1:5000                  | /                       |

## Table S2

Table S2. The detail information of primers.

| Primers    | Forward primer          | Reverse primer          |
|------------|-------------------------|-------------------------|
| Klf1       | TCTGAGGAGACGCAGGATTG    | ACAGGTCACGTCCCTCTCATC   |
| Klf2       | GAGCCTATCTTGCCGTCCTTT   | CACGTTGTTTAGGTCCTCATCC  |
| Klf3       | GATGAAGCCCAACAAATATGGGG | TCCACCTGTATCCCGTGAGTG   |
| Klf4       | AGGAACTCTCTCACATGAAGCG  | GGTCGTTGAACTCCTCGGTC    |
| Klf5       | CAGGCCACCTACTTTCCCC     | GAATCGCCAGTTTGGAAGCAA   |
| Klf6       | GTTTCTGCTCGGACTCCTGAT   | TTCCTGGAAGATGCTACACATTG |
| Klf7       | AGTGGACATTTTGCTCTCTCG   | GTTAATGAGGTCACCTGCGTTGA |
| Klf8       | CTGGAGAGTGATTTCAACATGCC | GGAGGACGGATTGGAGCTT     |
| Klf9       | GCCGCCTACATGGACTTCG     | GGTCACCGTGTTCCCTTGGT    |
| Klf10      | ATGCTCAACTTCGGCGCTT     | CGTTCCACCGCTTCAAAG      |
| Klf11      | CCCCACTCAAGAGCAACGAG    | CCAAGTTAGTGACGAGTAAGCC  |
| Klf12      | GTCAAAACCGAGCTTGTGGAA   | GGGCTCCCCTTTCACATTATTT  |
| Klf13      | CCTGGCCTCAGACAAAGGG     | ATTTCCCGTAAACTTTCTCGCA  |
| Klf14      | CTCCGTGTGCCTCAACTAGC    | CAGGCGCATCCAGGATAGC     |
| Klf15      | CAGAGAGCGTCAAGGTCGC     | TTCGCACAAACTTTGAGGGCA   |
| Klf16      | AGCATCCTGGCCGATCTGA     | GTGCGAAGACTTGTAATAGGCT  |
| Klf17      | AATAAGGAACAGGCTATGCACC  | GTGGCTGATGAAATCCGCTG    |
| Map1lc3b   | TTATAGAGCGATACAAGGGGGAG | CGCCGTCTGATTATCTTGATGAG |
| Sqstm1/p62 | GAACTCGCTATAAGTGCAGTGT  | AGAGAAGCTATCAGAGAGGTGG  |
| TFEB       | ACAAGGCACCATCCTCA       | CCAGCTCGGCCATATTCA      |
| Gapdh      | AGGTCGGTGTGAACGGATTTG   | GGGGTCGTTGATGGCAACA     |
